# Supplementary material for: Understanding the packing in the 1 : 1 molecular complex 1,3,5-tricyanobenzene–hexamethylbenzene by probing lattice modes
Source: Royal Society of Chemistry journal article supplement (doi:10.1039/c5ce00328h), 2015-01-01
Supplement: c5ce00328h1.pdf [file c5ce00328h1.pdf]

## Supplementary information

### Understanding the packing in the 1:1 molecular complex 1,3,5-tricyanobenzene-hexamethylbenzene by probing lattice modes

John A. Stride<sup>1,2</sup>

1. School of Chemistry, University of New South Wales, Sydney, New South Wales 2052, Australia.
2. Bragg Institute, Australian Nuclear Science and Technology Organisation, Locked Bag 2001, Kirrawee DC NSW 2232, Australia.

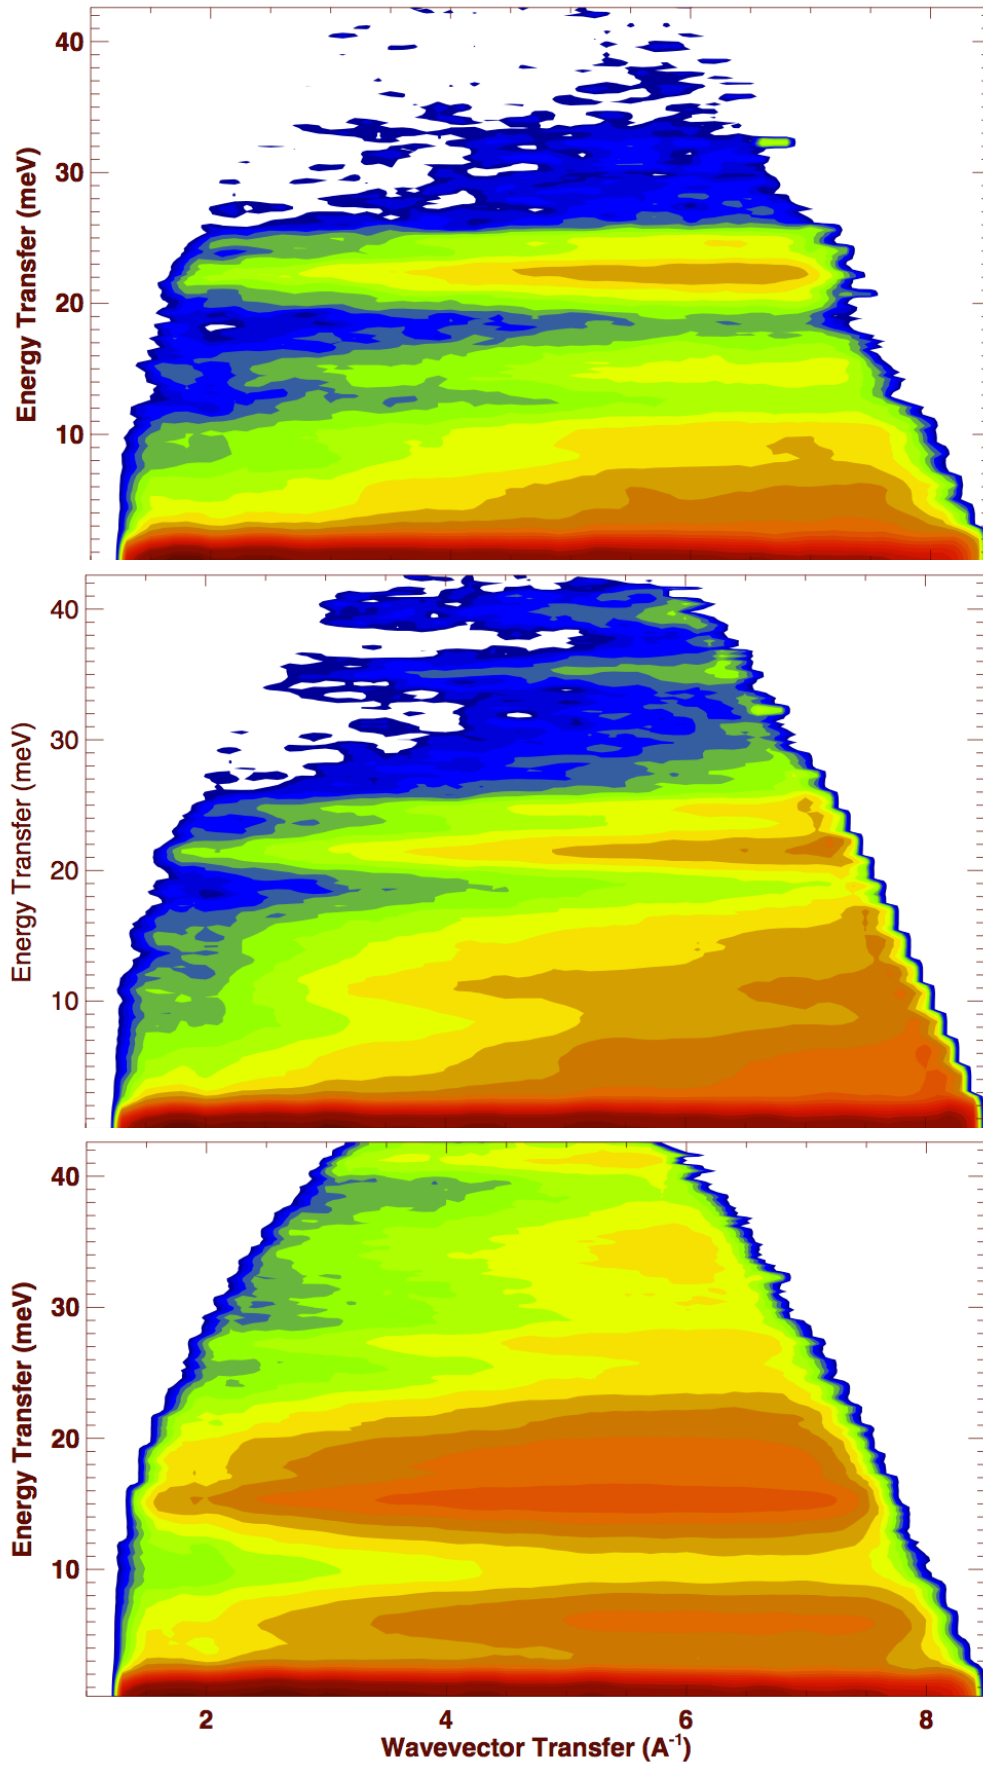

**Figure S1:  $S(Q, \omega)$  plots of (top): TCB, (middle): d-HMB:TCB and (bottom): HMB:TCB.** All data measured on IN4 at ILL, Grenoble, France at  $T = 1.5$  K and  $\lambda_i = 1.3$  Å. False colour plots are *not* normalized to a common scale.
